# Supplementary material for: Tomato leaf curl Yunnan virus-encoded C4 induces cell division through enhancing stability of Cyclin D 1.1 via impairing NbSKη -mediated phosphorylation in Nicotiana benthamiana
Source: PubMed Central journal article supplement (PMC5766254; doi:10.1371/journal.ppat.1006789), 2018-01-02

TLCYnV      TLCYnV (P33A)      TLCYnV (N34A)      TLCYnV (T35A)

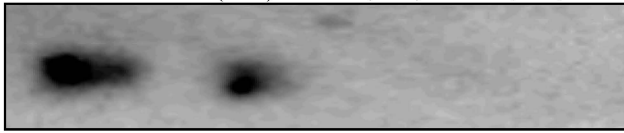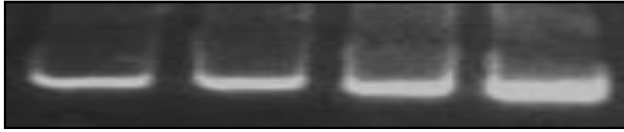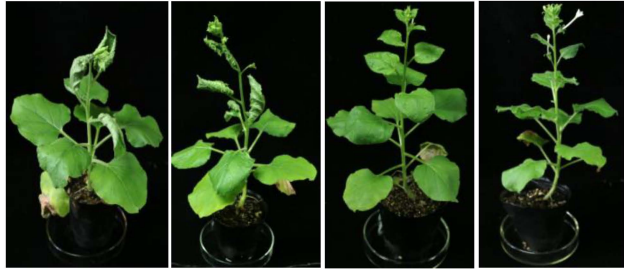

Supplement: ppat.1006789.s004.pdf [file ppat.1006789.s004.pdf]
