# Supplementary material for: Tomato leaf curl Yunnan virus-encoded C4 induces cell division through enhancing stability of Cyclin D 1.1 via impairing NbSKη -mediated phosphorylation in Nicotiana benthamiana
Source: PubMed Central journal article supplement (PMC5766254; doi:10.1371/journal.ppat.1006789), 2018-01-02

**A**

T + P53

T + Lam

AD + BD- TLCYnV C4

AD-BIN2+ BD

AD-BIN2+BD- TLCYnV C4

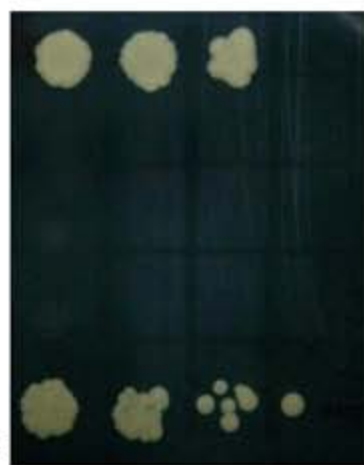

SD-Leu-Trp-His

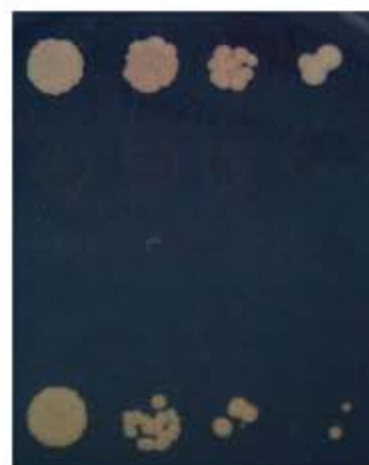

SD-Leu-Trp-His-Ade

**B**

YFP

Bright field

Overlay

BIN2-nYFP +  
C4-cYFP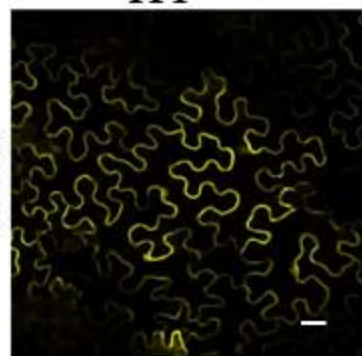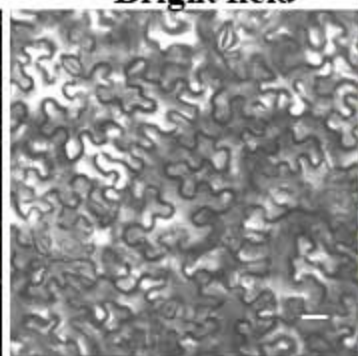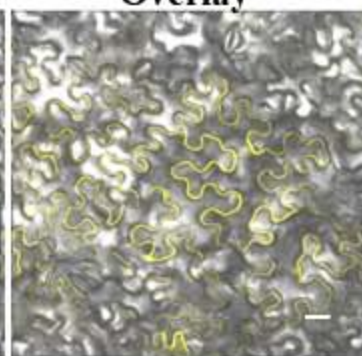

Supplement: ppat.1006789.s008.pdf [file ppat.1006789.s008.pdf]
