# Supplementary material for: Tomato leaf curl Yunnan virus-encoded C4 induces cell division through enhancing stability of Cyclin D 1.1 via impairing NbSKη -mediated phosphorylation in Nicotiana benthamiana
Source: PubMed Central journal article supplement (PMC5766254; doi:10.1371/journal.ppat.1006789), 2018-01-02
Supplement: ppat.1006789.s009.pdf [file ppat.1006789.s009.pdf]

**AD-BZR1 + BD-C4**

**AD-BIN2 + BD-C4**

**AD-BIN2 + BD-BZR1**

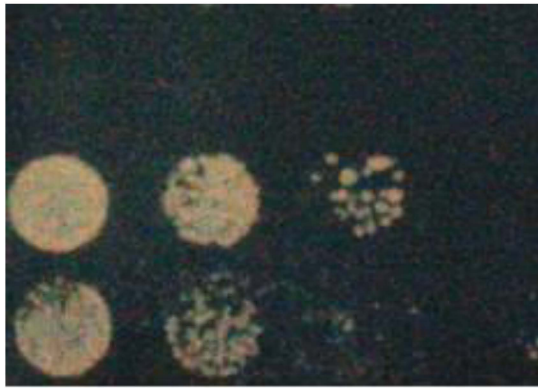

**SD-Leu-Trp-His-Ade**
