# Supplementary material for: Tomato leaf curl Yunnan virus-encoded C4 induces cell division through enhancing stability of Cyclin D 1.1 via impairing NbSKη -mediated phosphorylation in Nicotiana benthamiana
Source: PubMed Central journal article supplement (PMC5766254; doi:10.1371/journal.ppat.1006789), 2018-01-02
Supplement: ppat.1006789.s013.pdf [file ppat.1006789.s013.pdf]

A

*TRV-GFP+**TRV-CycD1;1+*

PVX

PVX-C4

PVX

PVX-C4

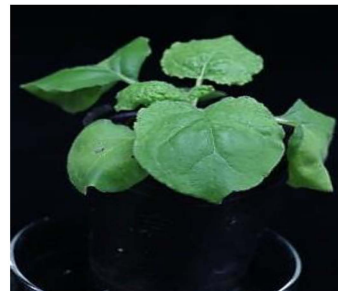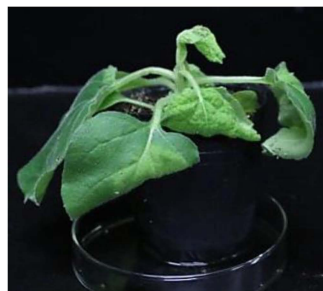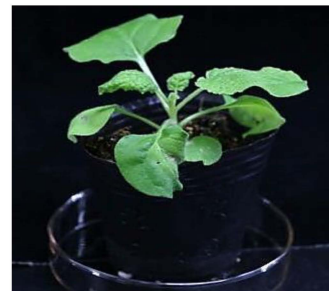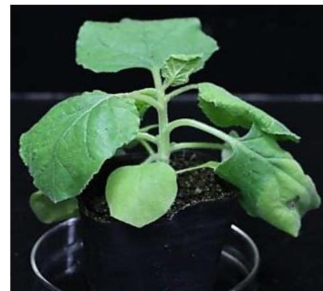

8 dpi

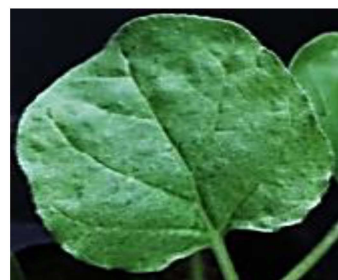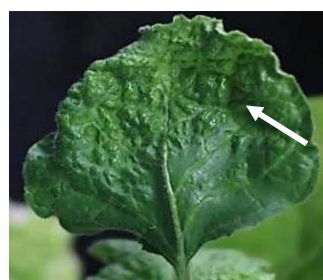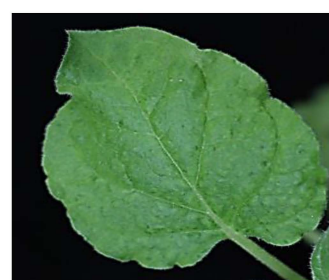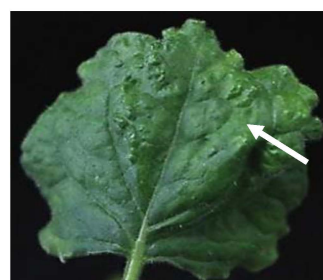

21 dpi

B

*TRV-GFP+**TRV-CycD1;1+*

PVX

PVX  
-C4

PVX

PVX  
-C4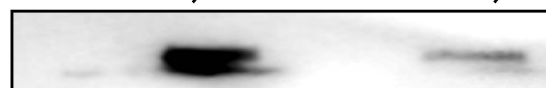

Anti-CycD1;1

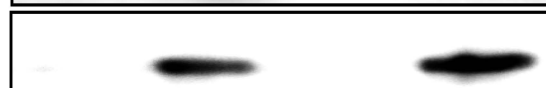

Anti-C4

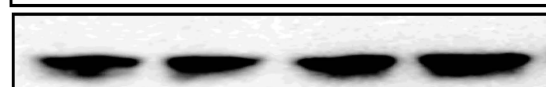

Anti-PVX CP

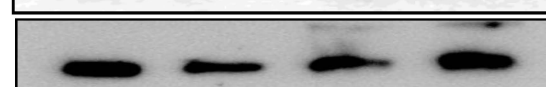

Anti-TRV CP

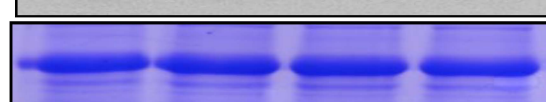

Rubisco
